# Supplementary material
Source: MDPI journal article supplement (https://www.mdpi.com/2076-3298/8/7/60)
Supplement: s1 [file s1]

**Table S1.** Wavelength classification according to separability thresholds for the seasonal Transformed Divergence (TD), Jeffries-Matusita (JM), and M-statistic (M) metrics.

| Season | Separability metric | Separability class |          |        |
|--------|---------------------|--------------------|----------|--------|
|        |                     | Poor               | Moderate | Good   |
| Spring | TD                  | 84.83%             | 1.92%    | 13.25% |
|        | JM                  | 93.71%             | 6.29%    | 0.00%  |
|        | M                   | 83.15%             | 16.85%   |        |
| Summer | TD                  | 80.40%             | 2.04%    | 17.57% |
|        | JM                  | 80.76%             | 4.80%    | 14.45% |
|        | M                   | 39.57%             | 60.43%   |        |
| Fall   | TD                  | 99.90%             | 0.12%    | 0.00%  |
|        | JM                  | 100%               | 0.00%    | 0.00%  |
|        | M                   | 91.97%             | 8.03%    |        |

**Table S2.** Mean simulated reflectance value (%) per Landsat 8 and Sentinel-2A band for each shrub species and season (B-Blue, G-Green, R-Red, RE-Red Edge, W. Vap.-Water Vapour, SWIR=Shortwave infrared).

| Mean simulated reflectance value (%) |               |           |      |      |      |        |        |             |      |      |      |      |      |      |      |         |        |        |
|--------------------------------------|---------------|-----------|------|------|------|--------|--------|-------------|------|------|------|------|------|------|------|---------|--------|--------|
| Season                               | Shrub species | Landsat 8 |      |      |      |        |        | Sentinel-2A |      |      |      |      |      |      |      |         |        |        |
|                                      |               | B         | G    | R    | NIR  | SWIR 1 | SWIR 2 | B           | G    | R    | RE 1 | RE 2 | RE 3 | NIR  | RE 4 | W. Vap. | SWIR 1 | SWIR 2 |
| Spring                               | W. Snow.      | 3.0       | 7.5  | 3.6  | 38.8 | 19.6   | 8.4    | 3.3         | 7.9  | 3.2  | 12.3 | 34.5 | 37.8 | 38.3 | 38.8 | 38.3    | 19.9   | 8.5    |
|                                      | Wolfw.        | 8.3       | 11.8 | 9.7  | 34.9 | 19.3   | 10.8   | 8.7         | 12.1 | 9.4  | 14.8 | 30.8 | 33.9 | 34.4 | 34.9 | 34.0    | 19.5   | 10.9   |
| Summer                               | W. Snow.      | 3.8       | 7.7  | 4.5  | 42.0 | 19.2   | 7.2    | 4.1         | 8.0  | 4.2  | 12.3 | 35.3 | 39.8 | 41.1 | 42.0 | 42.1    | 19.5   | 7.3    |
|                                      | Wolfw.        | 9.3       | 13.5 | 11.0 | 55.4 | 23.8   | 12.3   | 9.7         | 13.8 | 10.7 | 17.5 | 45.9 | 53.3 | 54.5 | 55.4 | 54.1    | 24.0   | 12.4   |
| Fall                                 | W. Snow.      | 5.0       | 11.4 | 7.4  | 38.4 | 22.6   | 9.7    | 5.6         | 11.8 | 6.7  | 18.0 | 31.8 | 34.9 | 37.0 | 38.4 | 40.6    | 22.9   | 9.8    |
|                                      | Wolfw.        | 9.8       | 14.9 | 14.2 | 53.2 | 32.7   | 18.4   | 10.3        | 15.2 | 14.0 | 22.1 | 43.4 | 49.3 | 51.7 | 53.2 | 54.1    | 33.0   | 18.5   |

**Table S3.** Mean simulated reflectance value per Sentinel-2B band for each shrub species and season (B-Blue, G-Green, R-Red, RE-Red Edge, W. Vap.-Water Vapour, SWIR=Shortwave infrared).

| Mean simulated reflectance value (%) |               |             |      |      |      |      |      |      |      |         |        |        |
|--------------------------------------|---------------|-------------|------|------|------|------|------|------|------|---------|--------|--------|
| Season                               | Shrub species | Sentinel-2B |      |      |      |      |      |      |      |         |        |        |
|                                      |               | B           | G    | R    | RE 1 | RE 2 | RE 3 | NIR  | RE 4 | W. Vap. | SWIR 1 | SWIR 2 |
| Spring                               | W. Snow.      | 3.3         | 7.9  | 3.2  | 12.1 | 34.0 | 37.7 | 38.3 | 38.8 | 38.4    | 19.7   | 8.4    |
|                                      | Wolfw.        | 8.7         | 12.1 | 9.4  | 14.7 | 30.4 | 33.8 | 34.4 | 34.9 | 34.1    | 19.3   | 10.8   |
| Summer                               | W. Snow.      | 4.1         | 8.1  | 4.2  | 12.1 | 34.8 | 39.7 | 41.1 | 42.0 | 42.2    | 19.3   | 7.2    |
|                                      | Wolfw.        | 9.7         | 13.9 | 10.7 | 17.3 | 45.1 | 53.2 | 54.5 | 55.4 | 54.2    | 23.8   | 12.3   |
| Fall                                 | W. Snow.      | 5.6         | 11.8 | 6.7  | 17.8 | 31.6 | 34.7 | 37.0 | 38.4 | 40.6    | 22.7   | 9.7    |
|                                      | Wolfw.        | 10.3        | 15.2 | 14.0 | 21.9 | 42.9 | 49.1 | 51.7 | 53.2 | 54.2    | 32.8   | 18.5   |
